# Supplementary material
Source: PubMed Central journal article supplement (PMC3249118)
Supplement: supp_M111.286526_Fig._S3.pdf [file supp_M111.286526_Fig._S3.pdf]

**Supplementary figure 3:**

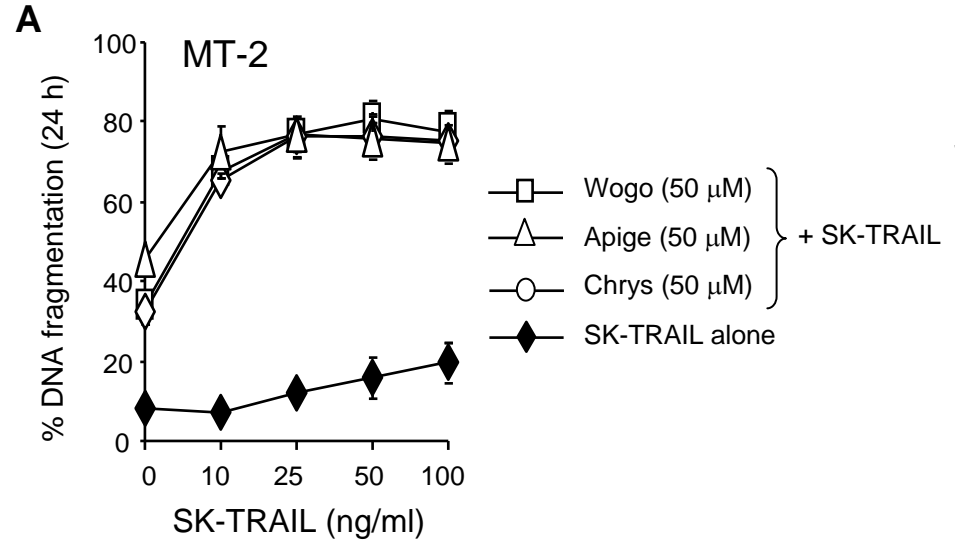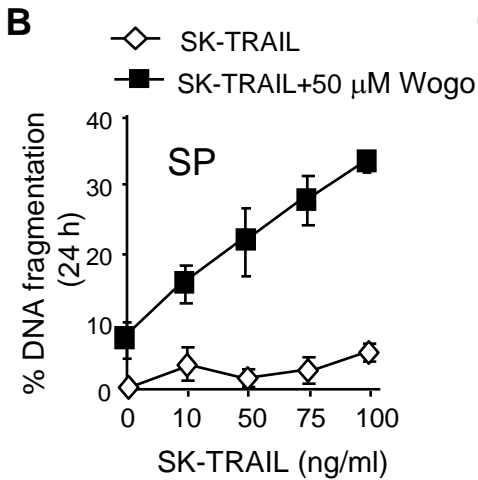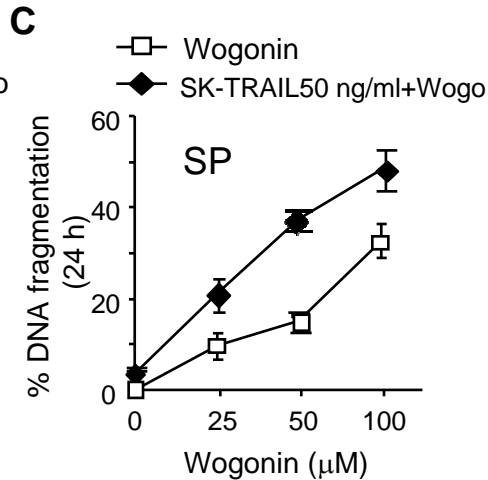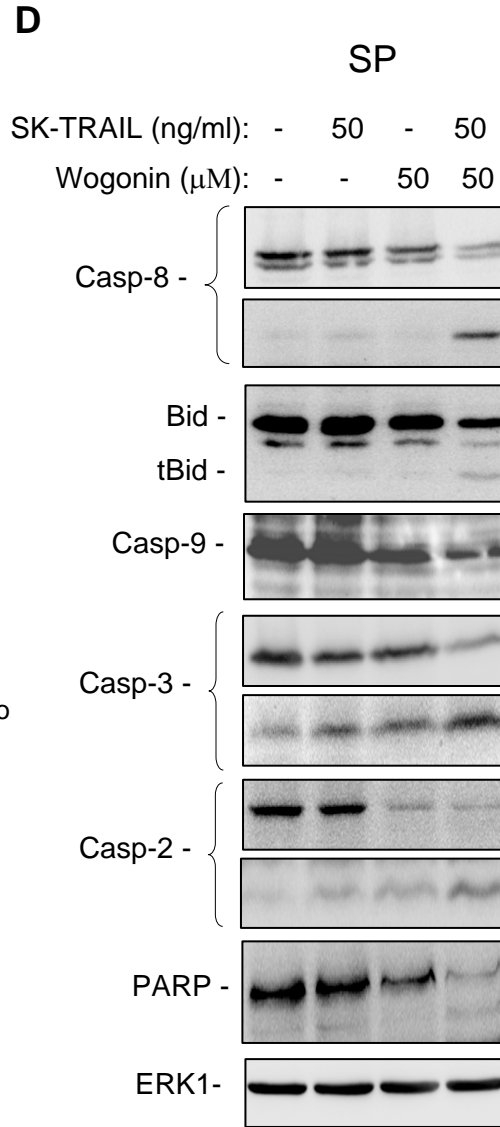

**Fig. S3. Flavones sensitize MT-2 and SP cells to TRAIL-mediated apoptosis .**

A. Flavones sensitize MT-2 cells to TRAIL-mediated apoptosis. MT-2 cells were treated with 50  $\mu$ M of indicated flavones in combination with different concentrations of TRAIL. B and C. Wogonin sensitizes TRAIL-mediated apoptosis in SP cells. SP cells were treated with either 50  $\mu$ M of Wogonin in combination with different concentrations of TRAIL (B) or 50 ng/ml SK-TRAIL in combination with different concentrations of Wogonin (C) for 24 h. Apoptosis was determined by DNA fragmentation. Data are representative of three independent experiments performed in duplicates. Means  $\pm$  SD are shown. D. Wogonin enhances TRAIL-induced pro-caspase-8 processing in SP cells. SP cells were untreated or treated with indicated drugs either alone or in combination. Cell lysates were subjected to Western blot analysis with antibodies against caspase-8, -9, -3, -2, Bid and PARP as indicated. Equal protein loading was controlled by ERK1.
