# Supplementary material
Source: PubMed Central journal article supplement (PMC3249118)
Supplement: supp_M111.286526_jbc.M111.286526-1.pdf [file supp_M111.286526_jbc.M111.286526-1.pdf]

**Supplementary figure 1:**

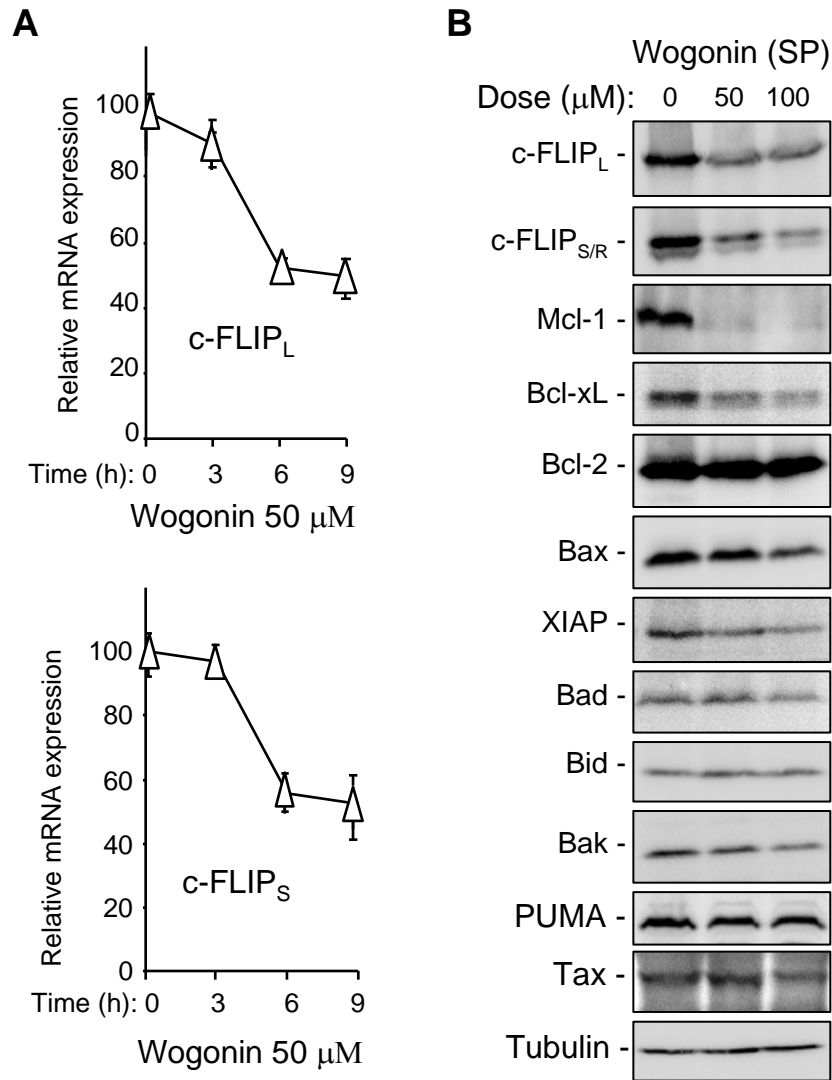

**Fig. S1. Wogonin inhibits c-FLIP expression in SP cells.**

A. Kinetic analysis of Wogonin-mediated inhibition of c-FLIP mRNA expression. SP cells were treated with 50  $\mu$ M of Wogonin for 3 to 9 h as indicated. The c-FLIP<sub>L</sub> and c-FLIP<sub>S</sub> mRNA expression levels were monitored by quantitative PCR. Data are representative of two independent experiments performed in triplicates. Means  $\pm$  SD are shown. B. Wogonin down-regulates c-FLIP protein expression in SP cells. SP cells were treated with different concentrations of Wogonin for 8 h. The protein expression levels of various pro- and anti-apoptotic proteins were analyzed by Western Blot. Tubulin was used to control for equal protein loadings. The results are representative of two independent experiments.
