# Supplementary material
Source: PubMed Central journal article supplement (PMC3249118)
Supplement: supp_M111.286526_jbc.M111.286526-2.pdf [file supp_M111.286526_jbc.M111.286526-2.pdf]

## Supplementary figure 2:

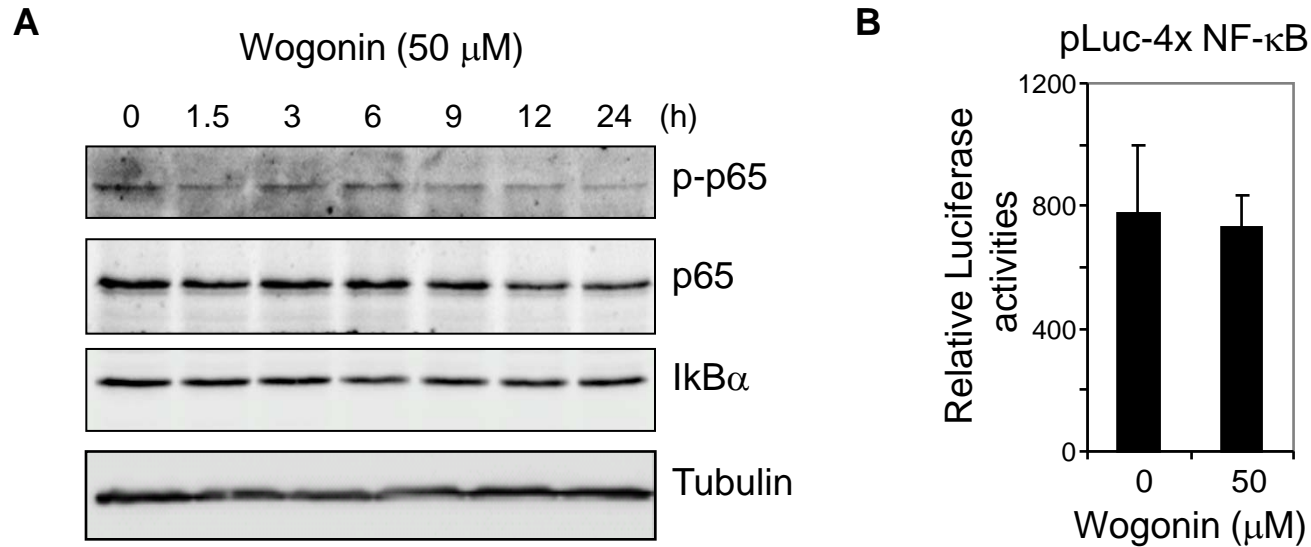

Fig. 2S. **Wogonin does not affect NF- $\kappa$ B activity in HTLV-1-infected cells.**

A. Wogonin dose not influence the expression levels of p65, phospho-p65 (p-p65) and Ikb $\alpha$ . SP cells were treated with 50  $\mu$ M Wogonin for indicated time periods. The protein expression levels of p65, phospho-p65 and Ikb $\alpha$  were analyzed by Western blot. Tubulin was used to control for equal protein loadings.

B. Wogonin dose not influence NF- $\kappa$ B-mediated transcriptional activity. MT-2 cells were transfected with the luciferase reporter construct containing 4 copies of the consensus DNA-binding element of NF- $\kappa$ B. After overnight culture, the cells were split and further cultured with or without 50  $\mu$ M Wogonin. Luciferase activity was determined 8 h later. Data are average of three independent transfections.
